# Supplementary material
Source: Springer Nature journal article supplement (http://www.springermedizin.de/resource/supplementary/12974_2010_288_MOESM2_ESM.pdf/9601170)
Supplement: MOESM2 [file 9601170]

## ALS spinal cord

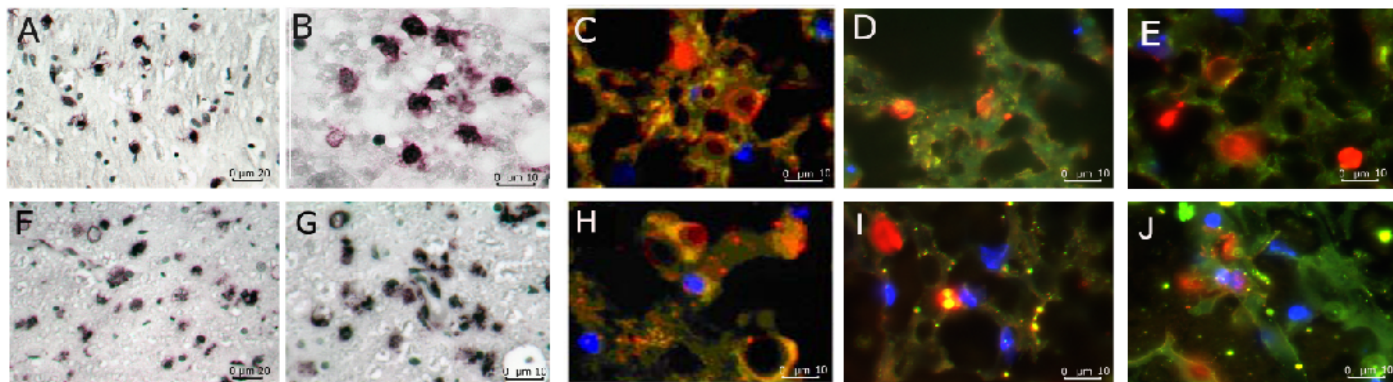

## Control spinal cord

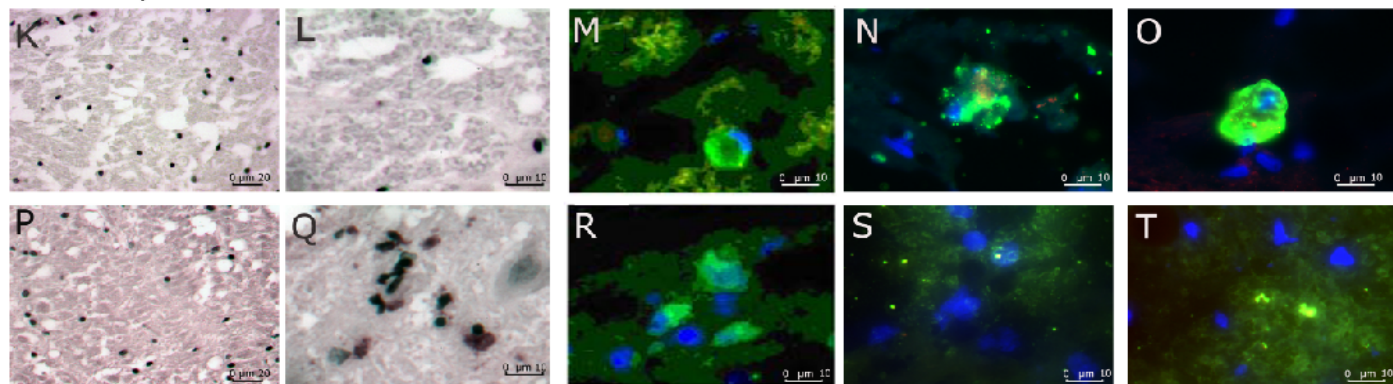

| U. Summary                         | ALS | AD  | Control |
|------------------------------------|-----|-----|---------|
| CD 8 <sup>a</sup>                  | 4/8 | 0/3 | 0/4     |
| IL-17/ CD 8 <sup>a</sup>           | 4/8 | 0/3 | 0/4     |
| IL-17/ CD 3 <sup>a</sup>           | 5/8 | 0/3 | 0/4     |
| CD 68 <sup>a</sup>                 | 4/8 | 2/3 | 0/3     |
| IL-1 $\beta$ / CD 68 <sup>a</sup>  | 3/3 | ND  | 0/3     |
| TNF- $\alpha$ / CD 68 <sup>a</sup> | 3/5 | ND  | 0/3     |
| Mast Cell Tryptase <sup>a</sup>    | 2/8 | 3/3 | 1/3     |

a. Number positive/Total number examined
